# Supplementary material
Source: publisher figshare collection journal article supplement (https://acs.figshare.com/ndownloader/files/4574875)
Supplement: Supplementary file 1 [file 4574875]

data_global

_audit_creation_date               29-09-08


_publ_contact_author_name
;

','

;
_publ_contact_author_address
;
ICSN-CNRS
1 avenue de la Terrasse
91198 Gif sur Yvette
France

;
_publ_contact_author_phone         3316982
_publ_contact_author_fax           33169077247
_publ_contact_author_email         @icsn.cnrs-gif.fr

_publ_requested_journal            ?
_publ_requested_category           FM

_publ_section_title
; 

Routes to ................
..........................
..........................

;

loop_
_publ_author_name
_publ_author_address

'CHAUMONT, Manon'
;ICSN-CNRS
1 avenue de la Terrasse
91198 Gif sur Yvette
France
;

'RETAILLEAU, Pascal'
;ICSN-CNRS
1 avenue de la Terrasse
91198 Gif sur Yvette
France
;
'BAUDOIN, Olivier'
;ICSN-CNRS
1 avenue de la Terrasse
91198 Gif sur Yvette
France
;

_publ_section_abstract
; ?
;

_publ_section_comment
; ?
;

_publ_section_exptl_prep
; ?
;


_publ_section_exptl_refinement
; ?
;


_publ_section_references
;
Altomare, A., Burla, M. C., Camalli, M., Cascarano, G. L., Giacovazzo, C.,
Guagliardi, A., Moliterni, A. G. G., Polidori, G. & Spagna, R. (1999). <i>J.
Appl. Cryst.</i> <b>32</b>, 115-119.

Macrae, C. F., Edgington, P. R., McCabe, P., Pidcock, E., Shields, G. P.,
Taylor, R., Towler, M. & van de Streek, J. (2006). Mercury: visualization and
analysis of crystal structures. <i>J.Appl. Cryst.</i> <b>39</b>, 453-457.

Nonius, B. V. (1999). <i>COLLECT</i>, data collection software.

Otwinowski, Z. & Minor, W. (1997). Methods in Enzymology, Volume 276,
Macromolecular Crystallography, part A, edited by C.W. Carter, Jr. & R.M.
Sweet, 307-326, 1997, New York: Academic Press.

Sheldrick, G.M. (2008).<i>Acta Cryst.</i> A<b>64</b>, 112-122.

Spek, A. L. (2003). <i>J.Appl. Cryst.</i> <b>36</b>, 7-13.

Welter, R. (2006). The Crystalbuilder Project
<i>Acta Cryst.</i> A<b>62</b>, s252.


;

_publ_section_figure_captions
; ?
;

_publ_section_acknowledgements
; ?
;
 
data_mc807b 
 
_audit_creation_method            SHELXL-97 
_chemical_name_systematic 
; 
 methyl 2-methyl-1,3-dioxo-4-propyl-2,3,3a,4,9,9a-hexahydro-1H-benzo[f]
 isoindole-4-carboxylate 
; 
_chemical_name_common             ? 
_chemical_melting_point           ? 
_chemical_formula_moiety          'C18 H21 N O4' 
_chemical_formula_sum 
 'C18 H21 N O4' 
_chemical_formula_weight          315.36 
_chemical_absolute_configuration  . 
 
loop_ 
 _atom_type_symbol 
 _atom_type_description 
 _atom_type_scat_dispersion_real 
 _atom_type_scat_dispersion_imag 
 _atom_type_scat_source 
 'C'  'C'   0.0033   0.0016 
 'International Tables Vol C Tables 4.2.6.8 and 6.1.1.4' 
 'H'  'H'   0.0000   0.0000 
 'International Tables Vol C Tables 4.2.6.8 and 6.1.1.4' 
 'N'  'N'   0.0061   0.0033 
 'International Tables Vol C Tables 4.2.6.8 and 6.1.1.4' 
 'O'  'O'   0.0106   0.0060 
 'International Tables Vol C Tables 4.2.6.8 and 6.1.1.4' 
 
_symmetry_cell_setting            'monoclinic' 
_symmetry_space_group_name_H-M    'P21/c' 
_symmetry_space_group_name_Hall   '-P 2ybc' 
 
loop_ 
 _symmetry_equiv_pos_as_xyz 
 'x, y, z' 
 '-x, y+1/2, -z+1/2' 
 '-x, -y, -z' 
 'x, -y-1/2, z-1/2' 
 
_cell_length_a                    13.432(3) 
_cell_length_b                    6.906(2) 
_cell_length_c                    19.147(3) 
_cell_angle_alpha                 90.00 
_cell_angle_beta                  113.59(1) 
_cell_angle_gamma                 90.00 
_cell_volume                      1627.7(7) 
_cell_formula_units_Z             4 
_cell_measurement_temperature     293(2) 
_cell_measurement_reflns_used     ? 
_cell_measurement_theta_min       ? 
_cell_measurement_theta_max       ? 
 
_exptl_crystal_description        prism 
_exptl_crystal_colour            'colourless'
_exptl_crystal_size_max           0.10 
_exptl_crystal_size_mid           0.10 
_exptl_crystal_size_min           0.10 
_exptl_crystal_density_meas       ? 
_exptl_crystal_density_diffrn     1.287 
_exptl_crystal_density_method     'not measured' 
_exptl_crystal_F_000              672 
_exptl_absorpt_coefficient_mu     0.091 
_exptl_absorpt_correction_type    multi-scan 
_exptl_absorpt_correction_T_min   ? 
_exptl_absorpt_correction_T_max   ?
_exptl_absorpt_process_details    'Scalepack (Otwinowski & Minor, 1997)'
     
_exptl_special_details 
; 
 ? 
; 
 
_diffrn_ambient_temperature       293(2) 
_diffrn_radiation_wavelength      0.71070 
_diffrn_radiation_type            MoK\a 
_diffrn_source                    'fine-focus sealed tube'
_diffrn_source_type               'Nonius Kappa CCD'
_diffrn_radiation_monochromator   graphite
_diffrn_measurement_device_type   'Nonius kappa-CCD diffractometer'
_diffrn_measurement_method        'phi and omega scans'
_diffrn_detector_area_resol_mean  9 
_diffrn_standards_number          0 
_diffrn_standards_interval_count  . 
_diffrn_standards_interval_time   . 
_diffrn_standards_decay_%         ? 
_diffrn_reflns_number             7066 
_diffrn_reflns_av_R_equivalents   0.0299 
_diffrn_reflns_av_sigmaI/netI     0.0385 
_diffrn_reflns_limit_h_min        -17 
_diffrn_reflns_limit_h_max        17 
_diffrn_reflns_limit_k_min        -9 
_diffrn_reflns_limit_k_max        9 
_diffrn_reflns_limit_l_min        -25 
_diffrn_reflns_limit_l_max        25 
_diffrn_reflns_theta_min          3.17 
_diffrn_reflns_theta_max          27.93 
_reflns_number_total              3873 
_reflns_number_gt                 2600 
_reflns_threshold_expression      >2sigma(I) 
 
_computing_data_collection       
'DENZO (Otwinowski & Minor, 1997); COLLECT (Nonius B.V., 1999)'
_computing_cell_refinement       
'DENZO (Otwinowski & Minor, 1997); COLLECT (Nonius B.V., 1999)'
_computing_data_reduction        'SCALEPACK (Otwinowski & Minor, 1997)'
_computing_structure_solution    'SHELXS97 (Sheldrick, 2008)'
_computing_structure_refinement  
 'SHELXL97 (Sheldrick, 2008); CRYSTALBUILDER (Welter, 2006)'
_computing_molecular_graphics    'PLATON (Spek, 2003)'
_computing_publication_material  'SHELXL97 (Sheldrick, 2008)' 
 
_refine_special_details 
; 
 Refinement of F^2^ against ALL reflections.  The weighted R-factor wR and 
 goodness of fit S are based on F^2^, conventional R-factors R are based 
 on F, with F set to zero for negative F^2^. The threshold expression of 
 F^2^ > 2sigma(F^2^) is used only for calculating R-factors(gt) etc. and is 
 not relevant to the choice of reflections for refinement.  R-factors based 
 on F^2^ are statistically about twice as large as those based on F, and R- 
 factors based on ALL data will be even larger. 
; 
 
_refine_ls_structure_factor_coef  Fsqd  
_refine_ls_matrix_type            full 
_refine_ls_weighting_scheme       calc  
_refine_ls_weighting_details 
 'calc w=1/[\s^2^(Fo^2^)+(0.0664P)^2^+0.3335P] where P=(Fo^2^+2Fc^2^)/3' 
_atom_sites_solution_primary      direct 
_atom_sites_solution_secondary    difmap 
_atom_sites_solution_hydrogens    geom 
_refine_ls_hydrogen_treatment    constr
_refine_ls_extinction_method      none 
_refine_ls_extinction_coef        ? 
_refine_ls_number_reflns          3873 
_refine_ls_number_parameters      211 
_refine_ls_number_restraints      0 
_refine_ls_R_factor_all           0.0803 
_refine_ls_R_factor_gt            0.0489 
_refine_ls_wR_factor_ref          0.1405 
_refine_ls_wR_factor_gt           0.1222 
_refine_ls_goodness_of_fit_ref    1.022 
_refine_ls_restrained_S_all       1.022 
_refine_ls_shift/su_max           0.009 
_refine_ls_shift/su_mean          0.001 
 
loop_ 
 _atom_site_label 
 _atom_site_type_symbol 
 _atom_site_fract_x 
 _atom_site_fract_y 
 _atom_site_fract_z 
 _atom_site_U_iso_or_equiv 
 _atom_site_adp_type 
 _atom_site_occupancy 
 _atom_site_symmetry_multiplicity 
 _atom_site_calc_flag 
 _atom_site_refinement_flags 
 _atom_site_disorder_assembly 
 _atom_site_disorder_group 
O1 O 0.77742(10) 0.03732(19) 0.81466(8) 0.0674(4) Uani 1 1 d . . . 
O2 O 0.92303(8) 0.14949(16) 0.91158(6) 0.0488(3) Uani 1 1 d . . . 
O3 O 0.44352(11) 0.1397(3) 0.91207(10) 0.0904(6) Uani 1 1 d . . . 
O4 O 0.57453(10) 0.63354(19) 0.81811(8) 0.0648(4) Uani 1 1 d . . . 
N1 N 0.49842(10) 0.4152(2) 0.87121(8) 0.0548(4) Uani 1 1 d . . . 
C1 C 0.74627(11) 0.2125(2) 0.99696(8) 0.0379(3) Uani 1 1 d . . . 
C2 C 0.76684(13) 0.2255(3) 1.07408(9) 0.0472(4) Uani 1 1 d . . . 
H2 H 0.7370 0.1345 1.0959 0.057 Uiso 1 1 calc R . . 
C3 C 0.83077(13) 0.3716(3) 1.11832(9) 0.0529(4) Uani 1 1 d . . . 
H3 H 0.8445 0.3787 1.1699 0.063 Uiso 1 1 calc R . . 
C4 C 0.87426(13) 0.5069(3) 1.08615(9) 0.0510(4) Uani 1 1 d . . . 
H4 H 0.9182 0.6047 1.1163 0.061 Uiso 1 1 calc R . . 
C5 C 0.85322(12) 0.4992(2) 1.00893(8) 0.0417(4) Uani 1 1 d . . . 
H5 H 0.8820 0.5930 0.9875 0.050 Uiso 1 1 calc R . . 
C6 C 0.78930(10) 0.3520(2) 0.96389(8) 0.0337(3) Uani 1 1 d . . . 
C7 C 0.76145(11) 0.3321(2) 0.87847(8) 0.0339(3) Uani 1 1 d . . . 
C8 C 0.81834(12) 0.1546(2) 0.86398(8) 0.0394(3) Uani 1 1 d . . . 
C9 C 0.98751(16) -0.0045(3) 0.89980(12) 0.0636(5) Uani 1 1 d . . . 
H9A H 0.9603 -0.1272 0.9080 0.095 Uiso 1 1 calc R . . 
H9B H 1.0618 0.0099 0.9350 0.095 Uiso 1 1 calc R . . 
H9C H 0.9832 0.0015 0.8486 0.095 Uiso 1 1 calc R . . 
C10 C 0.80129(12) 0.5043(2) 0.84495(8) 0.0386(3) Uani 1 1 d . . . 
H10A H 0.7680 0.6219 0.8533 0.046 Uiso 1 1 calc R . . 
H10B H 0.8792 0.5169 0.8729 0.046 Uiso 1 1 calc R . . 
C11 C 0.77687(17) 0.4887(3) 0.76002(9) 0.0595(5) Uani 1 1 d . . . 
H11A H 0.7992 0.3620 0.7498 0.071 Uiso 1 1 calc R . . 
H11B H 0.6991 0.4998 0.7311 0.071 Uiso 1 1 calc R . . 
C12 C 0.83337(18) 0.6413(3) 0.73335(10) 0.0658(5) Uani 1 1 d . . . 
H12A H 0.8136 0.7671 0.7448 0.099 Uiso 1 1 calc R . . 
H12B H 0.8121 0.6294 0.6793 0.099 Uiso 1 1 calc R . . 
H12C H 0.9106 0.6247 0.7589 0.099 Uiso 1 1 calc R . . 
C13 C 0.63693(11) 0.2958(2) 0.83757(8) 0.0382(3) Uani 1 1 d . . . 
H13 H 0.6197 0.2645 0.7841 0.046 Uiso 1 1 calc R . . 
C14 C 0.59464(12) 0.1309(2) 0.87261(9) 0.0465(4) Uani 1 1 d . . . 
H14 H 0.5666 0.0254 0.8356 0.056 Uiso 1 1 calc R . . 
C15 C 0.67881(13) 0.0509(2) 0.94805(10) 0.0480(4) Uani 1 1 d . . . 
H15A H 0.6418 -0.0168 0.9752 0.058 Uiso 1 1 calc R . . 
H15B H 0.7257 -0.0408 0.9375 0.058 Uiso 1 1 calc R . . 
C16 C 0.50321(13) 0.2203(3) 0.88781(10) 0.0569(5) Uani 1 1 d . . . 
C17 C 0.57043(12) 0.4709(2) 0.84048(9) 0.0452(4) Uani 1 1 d . . . 
C18 C 0.42105(17) 0.5477(4) 0.88178(14) 0.0821(7) Uani 1 1 d . . . 
H18A H 0.4576 0.6653 0.9049 0.123 Uiso 1 1 calc R . . 
H18B H 0.3907 0.4886 0.9142 0.123 Uiso 1 1 calc R . . 
H18C H 0.3640 0.5767 0.8332 0.123 Uiso 1 1 calc R . . 
 
loop_ 
 _atom_site_aniso_label 
 _atom_site_aniso_U_11 
 _atom_site_aniso_U_22 
 _atom_site_aniso_U_33 
 _atom_site_aniso_U_23 
 _atom_site_aniso_U_13 
 _atom_site_aniso_U_12 
O1 0.0599(8) 0.0556(8) 0.0769(9) -0.0298(7) 0.0172(7) 0.0065(6) 
O2 0.0396(6) 0.0503(7) 0.0548(6) -0.0065(5) 0.0171(5) 0.0133(5) 
O3 0.0521(8) 0.1211(14) 0.1071(12) 0.0387(10) 0.0414(8) 0.0022(8) 
O4 0.0538(7) 0.0503(8) 0.0883(9) 0.0145(7) 0.0265(7) 0.0160(6) 
N1 0.0360(7) 0.0722(10) 0.0562(8) 0.0069(7) 0.0185(6) 0.0132(7) 
C1 0.0313(6) 0.0394(8) 0.0437(7) 0.0057(6) 0.0158(6) 0.0098(6) 
C2 0.0413(8) 0.0578(10) 0.0467(8) 0.0135(8) 0.0221(7) 0.0125(8) 
C3 0.0470(9) 0.0760(12) 0.0377(8) 0.0007(8) 0.0193(7) 0.0100(9) 
C4 0.0462(9) 0.0642(11) 0.0425(8) -0.0137(8) 0.0178(7) -0.0013(8) 
C5 0.0401(8) 0.0457(9) 0.0418(8) -0.0058(7) 0.0192(6) -0.0020(7) 
C6 0.0292(6) 0.0373(7) 0.0355(7) -0.0007(6) 0.0137(6) 0.0066(6) 
C7 0.0325(7) 0.0331(7) 0.0358(7) -0.0033(6) 0.0135(6) 0.0029(6) 
C8 0.0407(7) 0.0380(8) 0.0416(7) -0.0027(7) 0.0187(6) 0.0021(6) 
C9 0.0578(11) 0.0606(12) 0.0770(12) 0.0007(10) 0.0318(10) 0.0271(9) 
C10 0.0410(8) 0.0375(8) 0.0393(8) -0.0024(6) 0.0181(6) 0.0004(6) 
C11 0.0843(13) 0.0557(11) 0.0432(9) -0.0050(8) 0.0304(9) -0.0132(9) 
C12 0.0974(15) 0.0606(12) 0.0517(10) -0.0071(9) 0.0428(10) -0.0139(11) 
C13 0.0327(7) 0.0411(8) 0.0376(7) -0.0036(6) 0.0108(6) 0.0008(6) 
C14 0.0396(8) 0.0447(9) 0.0498(9) -0.0022(7) 0.0124(7) -0.0064(7) 
C15 0.0453(9) 0.0400(9) 0.0588(10) 0.0074(7) 0.0211(8) 0.0020(7) 
C16 0.0338(8) 0.0779(13) 0.0545(10) 0.0118(9) 0.0128(7) -0.0014(8) 
C17 0.0332(7) 0.0511(10) 0.0447(8) 0.0009(7) 0.0086(7) 0.0066(7) 
C18 0.0571(11) 0.1090(19) 0.0886(15) 0.0135(14) 0.0379(11) 0.0389(12) 
 
_geom_special_details 
; 
 All esds (except the esd in the dihedral angle between two l.s. planes) 
 are estimated using the full covariance matrix.  The cell esds are taken 
 into account individually in the estimation of esds in distances, angles 
 and torsion angles; correlations between esds in cell parameters are only 
 used when they are defined by crystal symmetry.  An approximate (isotropic) 
 treatment of cell esds is used for estimating esds involving l.s. planes. 
; 
 
loop_ 
 _geom_bond_atom_site_label_1 
 _geom_bond_atom_site_label_2 
 _geom_bond_distance 
 _geom_bond_site_symmetry_2 
 _geom_bond_publ_flag 
O1 C8 1.1977(18) . ? 
O2 C8 1.3355(18) . ? 
O2 C9 1.4452(19) . ? 
O3 C16 1.211(2) . ? 
O4 C17 1.211(2) . ? 
N1 C17 1.373(2) . ? 
N1 C16 1.378(3) . ? 
N1 C18 1.459(2) . ? 
C1 C2 1.392(2) . ? 
C1 C6 1.399(2) . ? 
C1 C15 1.504(2) . ? 
C2 C3 1.375(3) . ? 
C2 H2 0.9300 . ? 
C3 C4 1.372(3) . ? 
C3 H3 0.9300 . ? 
C4 C5 1.391(2) . ? 
C4 H4 0.9300 . ? 
C5 C6 1.386(2) . ? 
C5 H5 0.9300 . ? 
C6 C7 1.5311(19) . ? 
C7 C8 1.527(2) . ? 
C7 C10 1.545(2) . ? 
C7 C13 1.5572(19) . ? 
C9 H9A 0.9600 . ? 
C9 H9B 0.9600 . ? 
C9 H9C 0.9600 . ? 
C10 C11 1.529(2) . ? 
C10 H10A 0.9700 . ? 
C10 H10B 0.9700 . ? 
C11 C12 1.502(3) . ? 
C11 H11A 0.9700 . ? 
C11 H11B 0.9700 . ? 
C12 H12A 0.9600 . ? 
C12 H12B 0.9600 . ? 
C12 H12C 0.9600 . ? 
C13 C17 1.517(2) . ? 
C13 C14 1.541(2) . ? 
C13 H13 0.9800 . ? 
C14 C16 1.504(2) . ? 
C14 C15 1.537(2) . ? 
C14 H14 0.9800 . ? 
C15 H15A 0.9700 . ? 
C15 H15B 0.9700 . ? 
C18 H18A 0.9600 . ? 
C18 H18B 0.9600 . ? 
C18 H18C 0.9600 . ? 
 
loop_ 
 _geom_angle_atom_site_label_1 
 _geom_angle_atom_site_label_2 
 _geom_angle_atom_site_label_3 
 _geom_angle 
 _geom_angle_site_symmetry_1 
 _geom_angle_site_symmetry_3 
 _geom_angle_publ_flag 
C8 O2 C9 116.48(13) . . ? 
C17 N1 C16 113.36(15) . . ? 
C17 N1 C18 123.15(18) . . ? 
C16 N1 C18 123.43(17) . . ? 
C2 C1 C6 119.53(14) . . ? 
C2 C1 C15 121.51(15) . . ? 
C6 C1 C15 118.95(13) . . ? 
C3 C2 C1 120.72(16) . . ? 
C3 C2 H2 119.6 . . ? 
C1 C2 H2 119.6 . . ? 
C4 C3 C2 119.76(15) . . ? 
C4 C3 H3 120.1 . . ? 
C2 C3 H3 120.1 . . ? 
C3 C4 C5 120.64(16) . . ? 
C3 C4 H4 119.7 . . ? 
C5 C4 H4 119.7 . . ? 
C6 C5 C4 120.07(15) . . ? 
C6 C5 H5 120.0 . . ? 
C4 C5 H5 120.0 . . ? 
C5 C6 C1 119.27(13) . . ? 
C5 C6 C7 123.79(13) . . ? 
C1 C6 C7 116.94(12) . . ? 
C8 C7 C6 109.88(11) . . ? 
C8 C7 C10 105.11(12) . . ? 
C6 C7 C10 113.40(11) . . ? 
C8 C7 C13 107.12(11) . . ? 
C6 C7 C13 107.80(12) . . ? 
C10 C7 C13 113.31(11) . . ? 
O1 C8 O2 123.09(14) . . ? 
O1 C8 C7 125.50(14) . . ? 
O2 C8 C7 111.34(12) . . ? 
O2 C9 H9A 109.5 . . ? 
O2 C9 H9B 109.5 . . ? 
H9A C9 H9B 109.5 . . ? 
O2 C9 H9C 109.5 . . ? 
H9A C9 H9C 109.5 . . ? 
H9B C9 H9C 109.5 . . ? 
C11 C10 C7 115.15(12) . . ? 
C11 C10 H10A 108.5 . . ? 
C7 C10 H10A 108.5 . . ? 
C11 C10 H10B 108.5 . . ? 
C7 C10 H10B 108.5 . . ? 
H10A C10 H10B 107.5 . . ? 
C12 C11 C10 112.93(14) . . ? 
C12 C11 H11A 109.0 . . ? 
C10 C11 H11A 109.0 . . ? 
C12 C11 H11B 109.0 . . ? 
C10 C11 H11B 109.0 . . ? 
H11A C11 H11B 107.8 . . ? 
C11 C12 H12A 109.5 . . ? 
C11 C12 H12B 109.5 . . ? 
H12A C12 H12B 109.5 . . ? 
C11 C12 H12C 109.5 . . ? 
H12A C12 H12C 109.5 . . ? 
H12B C12 H12C 109.5 . . ? 
C17 C13 C14 104.35(13) . . ? 
C17 C13 C7 112.52(12) . . ? 
C14 C13 C7 114.13(11) . . ? 
C17 C13 H13 108.5 . . ? 
C14 C13 H13 108.5 . . ? 
C7 C13 H13 108.5 . . ? 
C16 C14 C15 108.44(14) . . ? 
C16 C14 C13 104.63(13) . . ? 
C15 C14 C13 114.45(12) . . ? 
C16 C14 H14 109.7 . . ? 
C15 C14 H14 109.7 . . ? 
C13 C14 H14 109.7 . . ? 
C1 C15 C14 110.61(13) . . ? 
C1 C15 H15A 109.5 . . ? 
C14 C15 H15A 109.5 . . ? 
C1 C15 H15B 109.5 . . ? 
C14 C15 H15B 109.5 . . ? 
H15A C15 H15B 108.1 . . ? 
O3 C16 N1 124.08(19) . . ? 
O3 C16 C14 127.07(19) . . ? 
N1 C16 C14 108.83(15) . . ? 
O4 C17 N1 123.43(16) . . ? 
O4 C17 C13 127.96(16) . . ? 
N1 C17 C13 108.58(14) . . ? 
N1 C18 H18A 109.5 . . ? 
N1 C18 H18B 109.5 . . ? 
H18A C18 H18B 109.5 . . ? 
N1 C18 H18C 109.5 . . ? 
H18A C18 H18C 109.5 . . ? 
H18B C18 H18C 109.5 . . ? 
 
loop_ 
 _geom_torsion_atom_site_label_1 
 _geom_torsion_atom_site_label_2 
 _geom_torsion_atom_site_label_3 
 _geom_torsion_atom_site_label_4 
 _geom_torsion 
 _geom_torsion_site_symmetry_1 
 _geom_torsion_site_symmetry_2 
 _geom_torsion_site_symmetry_3 
 _geom_torsion_site_symmetry_4 
 _geom_torsion_publ_flag 
C6 C1 C2 C3 -1.4(2) . . . . ? 
C15 C1 C2 C3 178.48(15) . . . . ? 
C1 C2 C3 C4 0.4(2) . . . . ? 
C2 C3 C4 C5 0.8(3) . . . . ? 
C3 C4 C5 C6 -1.1(2) . . . . ? 
C4 C5 C6 C1 0.2(2) . . . . ? 
C4 C5 C6 C7 179.79(14) . . . . ? 
C2 C1 C6 C5 1.0(2) . . . . ? 
C15 C1 C6 C5 -178.81(13) . . . . ? 
C2 C1 C6 C7 -178.59(12) . . . . ? 
C15 C1 C6 C7 1.57(19) . . . . ? 
C5 C6 C7 C8 111.16(15) . . . . ? 
C1 C6 C7 C8 -69.24(16) . . . . ? 
C5 C6 C7 C10 -6.13(19) . . . . ? 
C1 C6 C7 C10 173.47(12) . . . . ? 
C5 C6 C7 C13 -132.43(14) . . . . ? 
C1 C6 C7 C13 47.18(16) . . . . ? 
C9 O2 C8 O1 1.5(2) . . . . ? 
C9 O2 C8 C7 -175.66(14) . . . . ? 
C6 C7 C8 O1 135.34(17) . . . . ? 
C10 C7 C8 O1 -102.31(18) . . . . ? 
C13 C7 C8 O1 18.5(2) . . . . ? 
C6 C7 C8 O2 -47.58(16) . . . . ? 
C10 C7 C8 O2 74.77(14) . . . . ? 
C13 C7 C8 O2 -164.42(12) . . . . ? 
C8 C7 C10 C11 58.96(17) . . . . ? 
C6 C7 C10 C11 179.00(13) . . . . ? 
C13 C7 C10 C11 -57.68(18) . . . . ? 
C7 C10 C11 C12 -170.16(15) . . . . ? 
C8 C7 C13 C17 -173.98(12) . . . . ? 
C6 C7 C13 C17 67.81(15) . . . . ? 
C10 C7 C13 C17 -58.53(16) . . . . ? 
C8 C7 C13 C14 67.35(15) . . . . ? 
C6 C7 C13 C14 -50.85(16) . . . . ? 
C10 C7 C13 C14 -177.20(12) . . . . ? 
C17 C13 C14 C16 3.62(15) . . . . ? 
C7 C13 C14 C16 126.84(13) . . . . ? 
C17 C13 C14 C15 -114.91(14) . . . . ? 
C7 C13 C14 C15 8.30(19) . . . . ? 
C2 C1 C15 C14 133.43(15) . . . . ? 
C6 C1 C15 C14 -46.73(19) . . . . ? 
C16 C14 C15 C1 -76.89(17) . . . . ? 
C13 C14 C15 C1 39.46(19) . . . . ? 
C17 N1 C16 O3 -176.59(17) . . . . ? 
C18 N1 C16 O3 0.6(3) . . . . ? 
C17 N1 C16 C14 4.74(19) . . . . ? 
C18 N1 C16 C14 -178.03(16) . . . . ? 
C15 C14 C16 O3 -61.1(2) . . . . ? 
C13 C14 C16 O3 176.31(18) . . . . ? 
C15 C14 C16 N1 117.47(15) . . . . ? 
C13 C14 C16 N1 -5.07(17) . . . . ? 
C16 N1 C17 O4 175.71(16) . . . . ? 
C18 N1 C17 O4 -1.5(3) . . . . ? 
C16 N1 C17 C13 -2.24(18) . . . . ? 
C18 N1 C17 C13 -179.49(16) . . . . ? 
C14 C13 C17 O4 -178.93(16) . . . . ? 
C7 C13 C17 O4 56.8(2) . . . . ? 
C14 C13 C17 N1 -1.09(16) . . . . ? 
C7 C13 C17 N1 -125.35(13) . . . . ? 
 
_diffrn_measured_fraction_theta_max    0.993 
_diffrn_reflns_theta_full              27.93 
_diffrn_measured_fraction_theta_full   0.993 
_refine_diff_density_max    0.185 
_refine_diff_density_min   -0.178 
_refine_diff_density_rms    0.038 
